# Supplementary material
Source: MDPI journal article supplement (https://www.mdpi.com/2073-445X/10/2/91)
Supplement: s1 [file s1]

## Questionnaire

To the investigated households:

Thanks a lot for being supportive for our survey! This survey is aimed at investigating the relationship between social capital and local households' perceptions toward benefits of the forest carbon sequestration projects (FCS projects). Data will be collected at the household level. During the survey, you will be requested to answer questions as a representative of your household. That is, your opinion should represent your household's opinion. If you are not sure of the answers to the questions, we encourage you to consult with your household members. If you do not understand the questions, please do not hesitate to ask us for clarification. We promise that your personal/household information will be recorded on a separate page and will be de-identified in the data analysis process to protect your privacy. Should you have any inquiry prior to the survey, please feel free to ask. Thank you for your participation!

Information of the respondent:

|                        |  |                                  |  |
|------------------------|--|----------------------------------|--|
| Name of the respondent |  | Contact number of the respondent |  |
| Residential address    |  |                                  |  |

**Household information:**

|                                                 |  |                                                                                                                |  |
|-------------------------------------------------|--|----------------------------------------------------------------------------------------------------------------|--|
| Gender of the household head (male=1; female=0) |  | Age of the household head (yrs)                                                                                |  |
| Years of schooling of the household head (yrs)  |  | Political power of the household/There is at least one elected village official in the household (yes=1; 0=no) |  |

**Social capital:**

1. Overall, how will you rate your household's relationship with other neighboring households?
  - A. Very bad
  - B. Relatively bad
  - C. Neutral
  - D. Relatively good
  - E. Very good
2. Overall, how will you rate your household's relationship with village officials?
  - A. Very bad
  - B. Relatively bad
  - C. Neutral
  - D. Relatively good
  - E. Very good
3. Is your household a member of any local association(s)?  
1=yes  
0=no
4. How often is your household involved in village public event on a yearly basis? Please tell us the actual times of participation.

**Household's perceptions toward benefits of FCS projects:****Statements to elicit household's perceptions toward social benefits of FCS projects:**

1. The project enhances your life satisfaction level.
  - A. Strongly disagree
  - B. Disagree

- C. Neutral
  - D. Agree
  - E. Strongly agree
2. Your desire to learn new skills is strengthened.
    - A. Strongly disagree
    - B. Disagree
    - C. Neutral
    - D. Agree
    - E. Strongly agree
  3. Your life is enriched, less boring than before.
    - A. Strongly disagree
    - B. Disagree
    - C. Neutral
    - D. Agree
    - E. Strongly agree
  4. You feel fulfilled by supporting the project.
    - A. Strongly disagree
    - B. Disagree
    - C. Neutral
    - D. Agree
    - E. Strongly agree
  5. Your awareness of ecological protection is enhanced.
    - A. Strongly disagree
    - B. Disagree
    - C. Neutral
    - D. Agree
    - E. Strongly agree

**Statements to elicit household's perceptions toward economic benefits of FCS projects:**

6. You receive satisfactory income from your participation in the project.
  - A. Strongly disagree
  - B. Disagree
  - C. Neutral
  - D. Agree
  - E. Strongly agree
7. Received payment for renting out or transferring land to the project developer is up to your expectations.

- A. Strongly disagree
  - B. Disagree
  - C. Neutral
  - D. Agree
  - E. Strongly agree
8. You obtain income by harvesting non-timber forest products, or you harvest these non-timber forest products for own use.
- A. Strongly disagree
  - B. Disagree
  - C. Neutral
  - D. Agree
  - E. Strongly agree
9. Your income is enhanced by participating the project.
- A. Strongly disagree
  - B. Disagree
  - C. Neutral
  - D. Agree
  - E. Strongly agree

**Statements to elicit household's perceptions toward environmental benefits of FCS projects:**

10. Local air quality is improved.
- A. Strongly disagree
  - B. Disagree
  - C. Neutral
  - D. Agree
  - E. Strongly agree
11. Local biodiversity is enhanced.
- A. Strongly disagree
  - B. Disagree
  - C. Neutral
  - D. Agree
  - E. Strongly agree
12. Natural disasters decrease in local areas.
- A. Strongly disagree
  - B. Disagree
  - C. Neutral
  - D. Agree

E. Strongly agree

13. Local forest coverage rate increases.

A. Strongly disagree

B. Disagree

C. Neutral

D. Agree

E. Strongly agree
